# Supplementary material for: Agricultural Use of Copper and Its Link to Alzheimer’s Disease
Source: MDPI journal article supplement (doi:10.3390/biom10060897), 2020-06-12
Supplement: s1 [file s1]

## **Announcement: [Biomolecules--IF 4.694] Special Issue "Toxic and essential metals in Human Health and Disease"**

Dear colleagues,

We are serving as Guest Editor for the Special Issue "Toxic and essential metals in Human Health and Disease" in *Biomolecules*, together with the Editor-in-Chief of *Biomolecules*, Prof. Vladimir N. Uversky, we cordially invite you to submit your next original article or comprehensive review related to the theme of "Toxic and essential metals in Human Health and Disease".

1. This Special Issue publishes both comprehensive reviews and original articles.

2. The submission deadline is **31 March 2020** and will be followed by a prompt review/revision process. The articles will be published upon acceptance on an ongoing basis. The review and publication processes will be handled by the Editorial Office.

3. *Biomolecules* (<http://www.mdpi.com/journal/cells>) is one of MDPI's open access journals. It is indexed in \*SCIE\*, PubMed and Scopus. It is eligible for inclusion in the Journal Citation Reports (JCR), and the Impact Factor (2018) is 4.694. *Biomolecules* has entered the ranking in the category 'Biochemistry & Molecular Biology' (SCIE) 58 of 298 (80.70%, Q1). The Article Processing Charges (APCs) are 1200 CHF (1800 CHF after **31 December 2019**) per accepted paper. **However, as a invited author, you can enjoy a 100% discount.** You may be entitled to a discount if you have previously received a discount code or if your institute is participating in the MDPI Institutional Open Access Program (IOAP); for more information, see: <http://www.mdpi.com/about/ioap>.

4. Benefits of publishing in *Biomolecules*:

- a. Open access and high visibility: unlimited access, broad database coverage, various promotional activities and academic event presentations;
- b. Rapid turn-around: 17 days from submission to first decision.

5. For more information about the special issue, please click on the following link:

[https://www.mdpi.com/journal/biomolecules/special\\_issues/Toxic\\_essential\\_metals](https://www.mdpi.com/journal/biomolecules/special_issues/Toxic_essential_metals)

You can get more information for authors here:

<https://www.mdpi.com/journal/biomolecules/instructions>

To submit your manuscript, please click on the following link:

<http://susy.mdpi.com/user/manuscripts/upload?journal=biomolecules>

In order for us to plan this Special Issue, we kindly ask you to inform us as to whether you are interested in contributing to this issue. If you have questions, problems or anything you would like to know more, please feel free to contact us or the assistant editor for this Special Issue June Xiong ([june.xiong@mdpi.com](mailto:june.xiong@mdpi.com)).

We look forward to hearing from you.

Thank,

Prof. Valeria M Nurchi

Prof. Jan Aaseth
